# Supplementary material for: Facile and rapid access to linear and truncated microcystin analogues for the implementation of immunoassays
Source: Royal Society of Chemistry journal article supplement (doi:10.1039/b920193a), 2009-12-08
Supplement: b920193a.pdf [file b920193a.pdf]

## Facile and Rapid Access to Linear and Truncated Microcystin Analogues for the Implementation of Immunoassays

**Guillaume Clavé,<sup>a,b</sup> Cyril Ronco,<sup>a,b</sup> Hervé Boutal,<sup>c</sup> Nathalie Khreich,<sup>c</sup> Hervé Volland,<sup>c</sup> Xavier Franck,<sup>a</sup> Anthony Romieu<sup>\*a,b</sup> and Pierre-Yves Renard<sup>\*a,b,d</sup>**

<sup>a</sup>*Dr. G. Clavé, C. Ronco, Dr. X. Franck, Dr. A. Romieu, Pr. P.-Y. Renard  
Equipe de Chimie Bio-Organique, COBRA - CNRS UMR 6014 & FR 3038, rue Lucien  
Tesnière, 76131 Mont-Saint-Aignan, France  
Fax (+33)2-35-52-29-59  
E-mail: [pierre-yves.renard@univ-rouen.fr](mailto:pierre-yves.renard@univ-rouen.fr) or [anthony.romieu@univ-rouen.fr](mailto:anthony.romieu@univ-rouen.fr)*

<sup>b</sup>*Dr. G. Clavé, C. Ronco, Dr. A. Romieu, Pr. P.-Y. Renard  
Université de Rouen, Place Emile Blondel, 76821 Mont-Saint-Aignan, France*

<sup>c</sup>*H. Boutal, Dr. N. Khreich, Dr. H. Volland  
Laboratoire d'Etudes et de Recherches en Immuno-analyse, Commissariat à l'Energie  
Atomique Saclay, F-91191, Gif sur Yvette, France*

<sup>d</sup>*Pr. P.-Y. Renard  
Institut Universitaire de France*

### Supporting Information

ESI mass spectrum of **19** recorded in the positive mode.

ESI mass spectrum of free aminoxy tripod recorded in the positive mode.

ESI mass spectrum of free aminoxy tripod recorded in the negative mode.

ESI mass spectrum of free sulfhydryl tripod recorded in the positive mode.

ESI mass spectrum of free sulfhydryl tripod recorded in the negative mode.

ESI mass spectrum of "microcystin tripod" **20** recorded in the positive mode.

ESI mass spectrum of **19** recorded in the positive mode.<sup>a</sup>

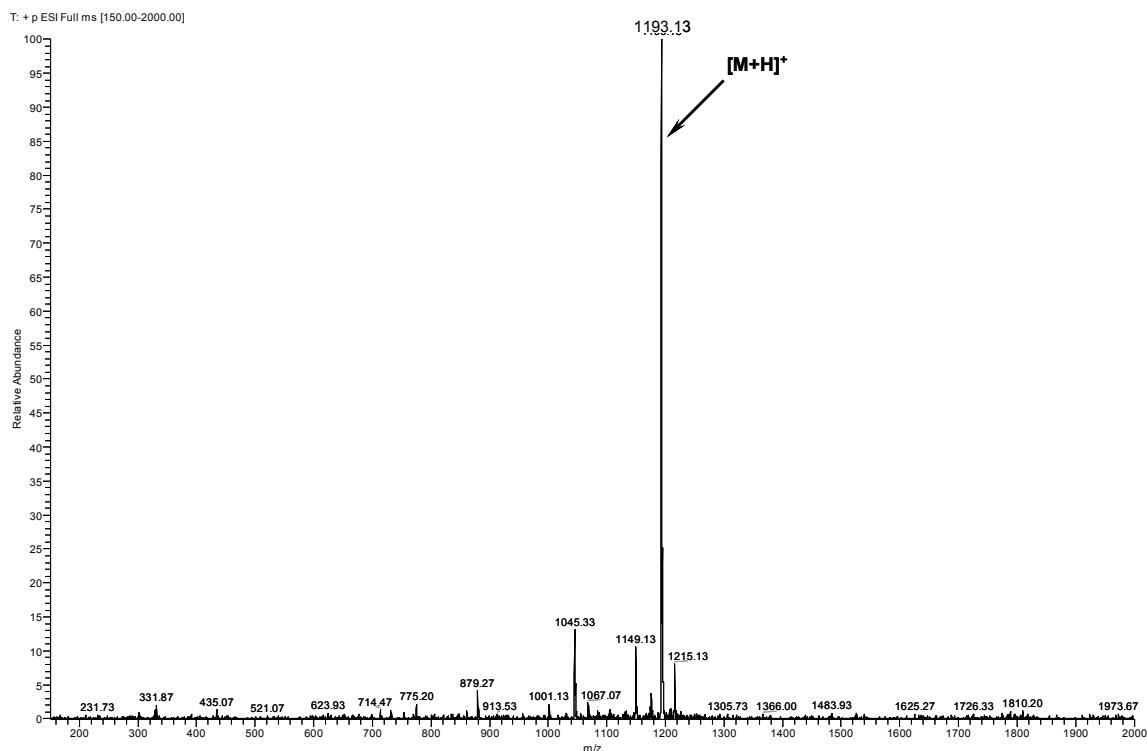

Under our ionisation conditions, the expected  $[M + H]^+$  at  $m/z = 1159.50$  was not observed. We suspected that oxidation of Adda side-chain occurs during the ESI analysis, especially hydroxylation of (C4-C5) or (C6-C7) double bond, probably mediated by reactive oxygen species (ROS) generated under discharge conditions (see Boys *et al.* (*Anal. Chem.*, 2009, **81**, 4027) for a comprehensive study about oxidative modifications during electrospray ionisation). Furthermore, hydration of phthalimide moiety also occurred ( $\Delta M$  of +18 Da).

ESI mass spectrum of free aminoxy tripod recorded in the positive mode.<sup>a</sup>

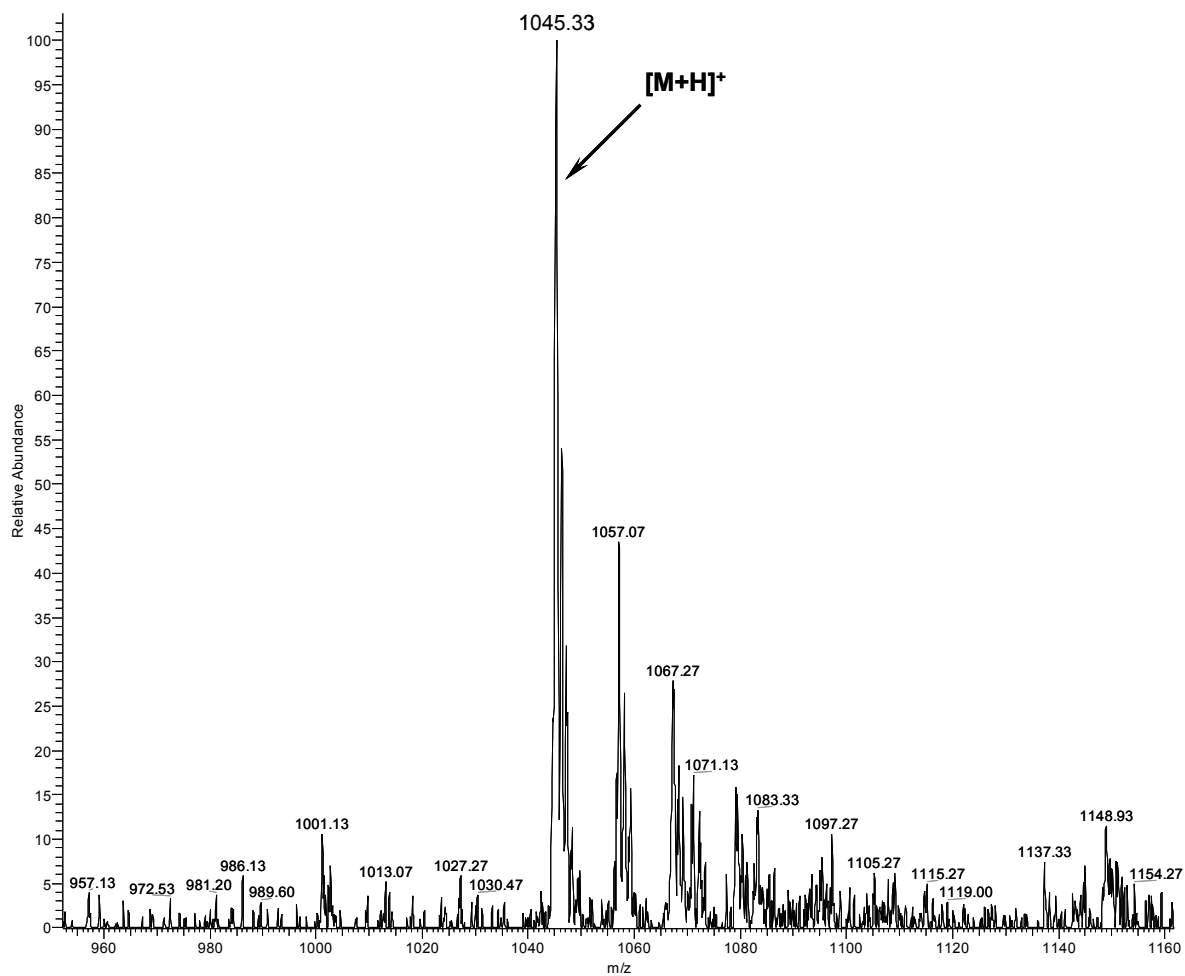

Under our ionisation conditions, the expected  $[M + H]^+$  at  $m/z = 1029.50$  was not observed. We suspected that oxidation of Adda side-chain occurs during the ESI analysis, especially hydroxylation of (C4-C5) or (C6-C7) double bond, probably mediated by reactive oxygen species (ROS) generated under discharge conditions (see Boys *et al.* (*Anal. Chem.*, 2009, **81**, 4027) for a comprehensive study about oxidative modifications during electrospray ionisation).

ESI mass spectrum of free aminoxy tripod recorded in the negative mode.<sup>a</sup>

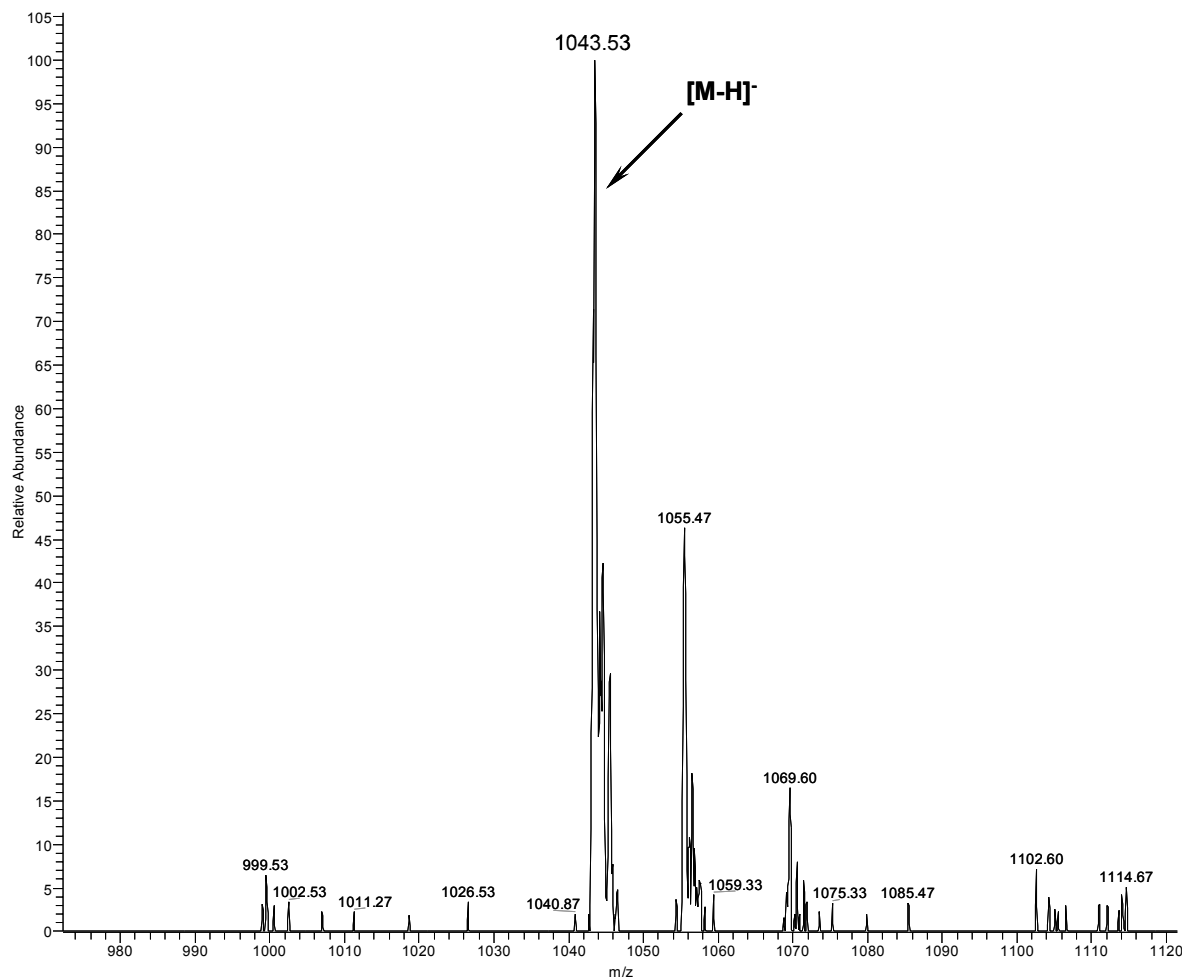

Under our ionisation conditions, the expected [M - H]<sup>-</sup> at  $m/z = 1027.48$  was not observed. We suspected that oxidation of Adda side-chain occurs during the ESI analysis, especially hydroxylation of (C4-C5) or (C6-C7) double bond, probably mediated by reactive oxygen species (ROS) generated under discharge conditions (see Boys *et al.* (*Anal. Chem.*, 2009, **81**, 4027) for a comprehensive study about oxidative modifications during electrospray ionisation).

## ESI mass spectrum of free sulfhydryl tripod recorded in the positive mode.<sup>a</sup>

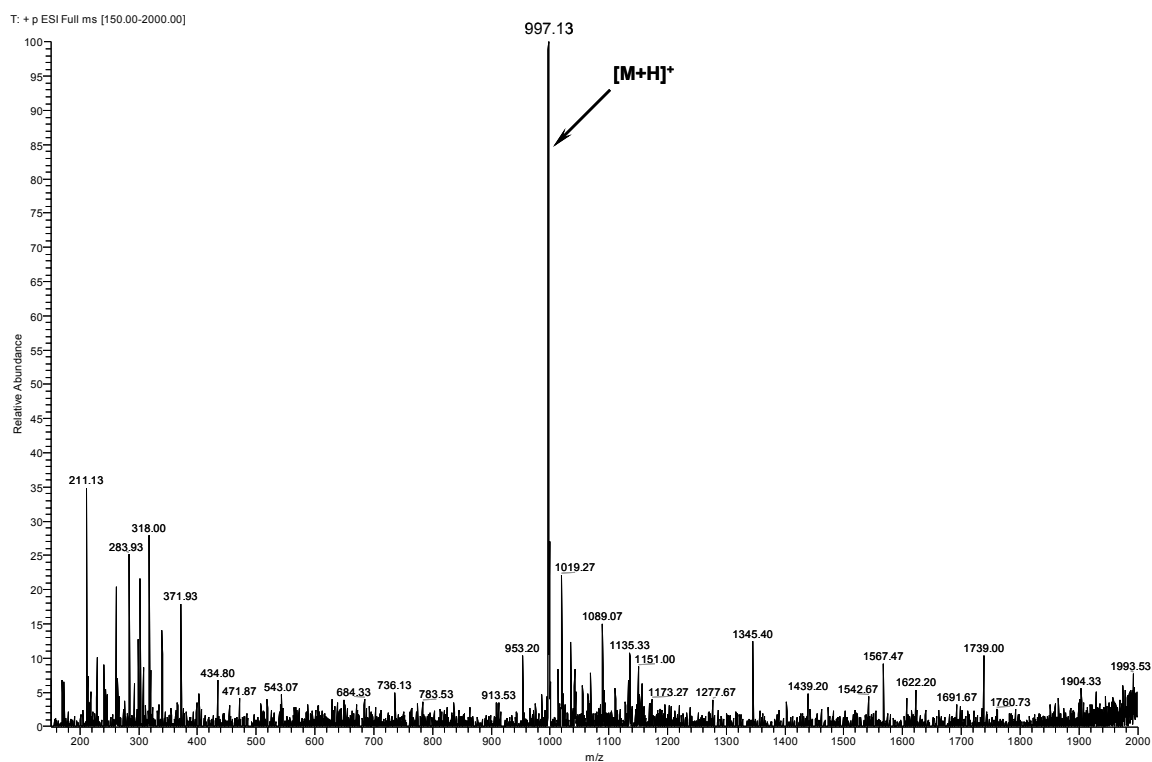

Under our ionisation conditions, the expected  $[M + H]^+$  at  $m/z = 969.49$  was not observed. We suspected that oxidation of Adda side-chain occurs during the ESI analysis, especially hydroxylation of (C4-C5) or (C6-C7) double bond, probably mediated by reactive oxygen species (ROS) generated under discharge conditions (see Boys *et al.* (*Anal. Chem.*, 2009, **81**, 4027) for a comprehensive study about oxidative modifications during electrospray ionisation). Furthermore, formation of an oxime ( $\Delta M$  of +12 Da) between the aminoxy group and formaldehyde (generated from methanol under discharge conditions) was also observed. Such ligation reaction was also observed with the *S*Et derivative (see the corresponding mass spectrum: peak with  $m/z = 1057.07$ , *vide supra*).

## ESI mass spectrum of free sulfhydryl tripod recorded in the negative mode.<sup>a</sup>

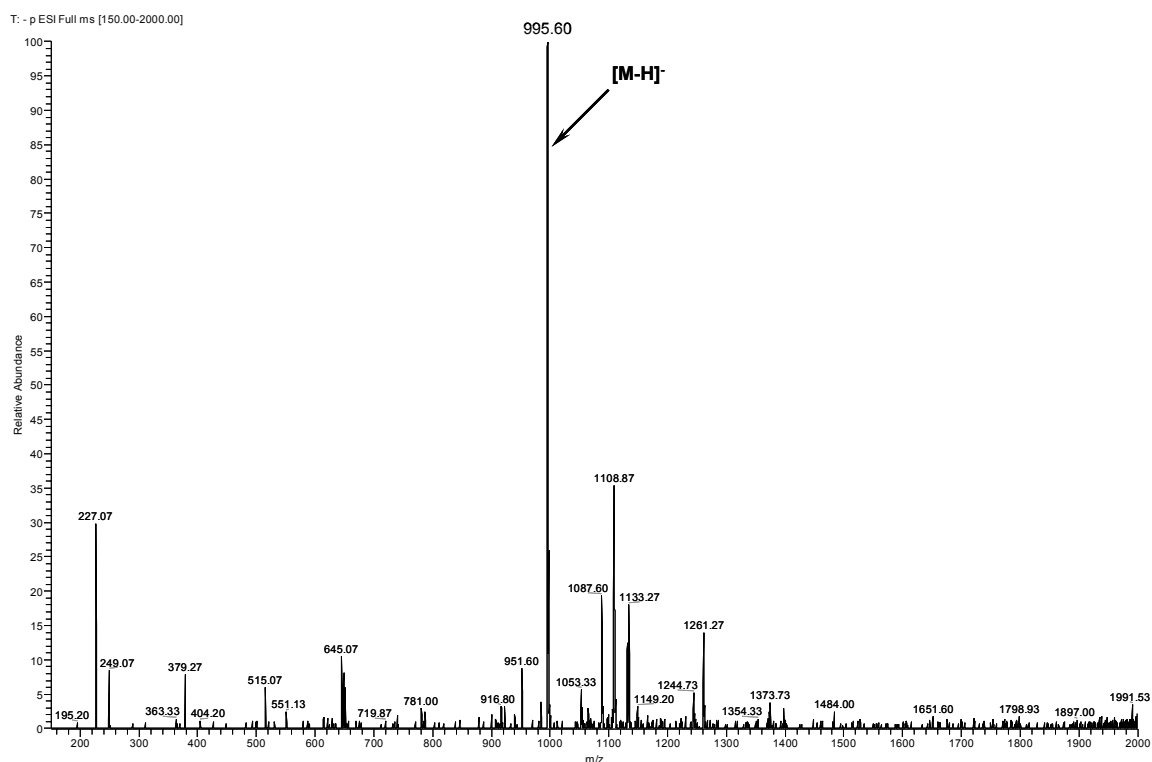

Under our ionisation conditions, the expected  $[M - H]^-$  at  $m/z = 967.48$  was not observed. We suspected that oxidation of Adda side-chain occurs during the ESI analysis, especially hydroxylation of (C4-C5) or (C6-C7) double bond, probably mediated by reactive oxygen species (ROS) generated under discharge conditions (see Boys *et al.* (*Anal. Chem.*, 2009, 81, 4027) for a comprehensive study about oxidative modifications during electrospray ionisation). Furthermore, formation of an oxime ( $\Delta m$  of +12 Da) between the aminoxy group and formaldehyde (generated from methanol under discharge conditions) was also observed. Such ligation reaction was also observed with the *SEt* derivative (see the corresponding mass spectra: peak with  $m/z = 1055.47$ , *vide supra*).

ESI mass spectrum of "microcystin tripod" **20** recorded in the positive mode.<sup>a</sup>

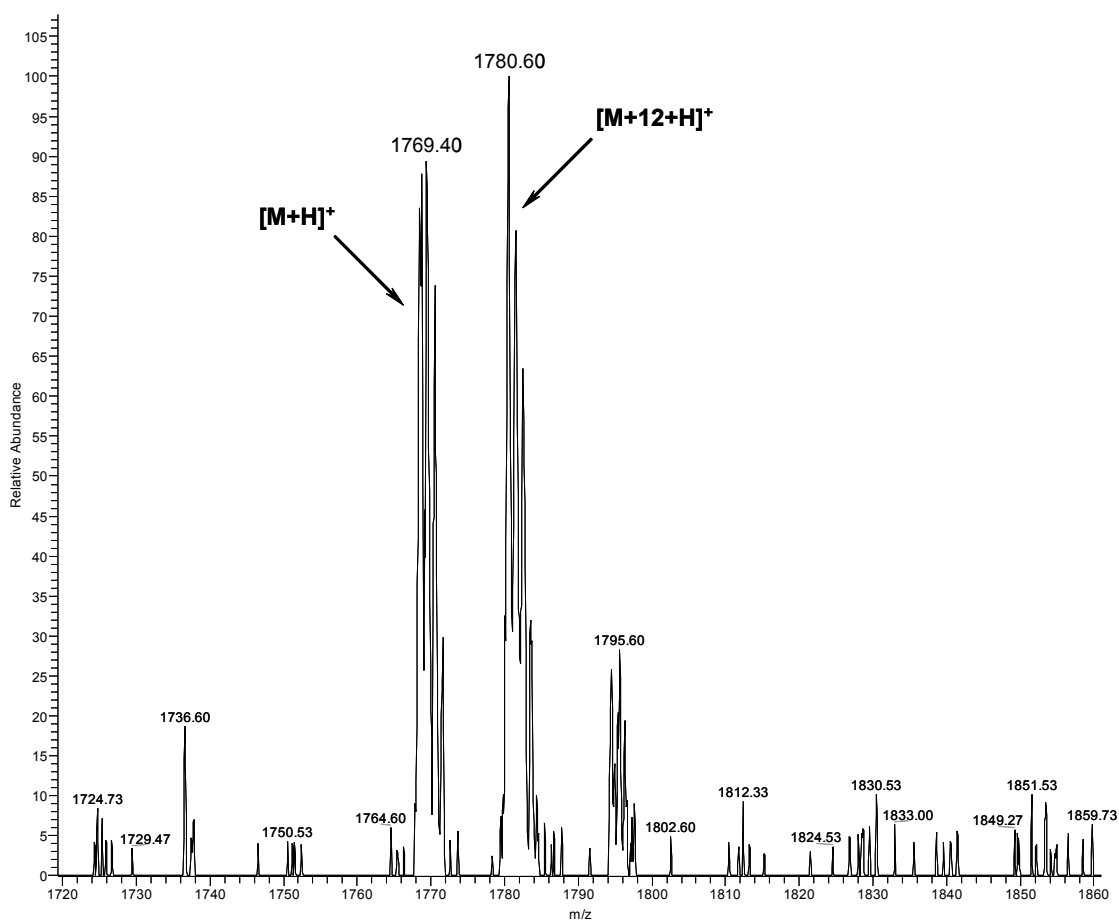

Under our ionisation conditions, the expected  $[M + H]^+$  at  $m/z = 1737.49$  was not observed. We suspected that oxidation of Adda side-chain occurs during the ESI analysis, especially hydroxylation of (C4-C5) or (C6-C7) double bond, probably mediated by reactive oxygen species (ROS) generated under discharge conditions (see Boys *et al.* (*Anal. Chem.*, 2009, **81**, 4027) for a comprehensive study about oxidative modifications during electrospray ionisation). Furthermore, hydration of maleimide moiety also occurred ( $\Delta M$  of +18 Da). A second major peak at  $m/z = 1780.60$  corresponding to the formaldehyde-oxime derivative was also observed ( $\Delta M$  of +12 Da).
